# Supplementary material
Source: PubMed Central journal article supplement (PMC1255995)
Supplement: plntphys_pp.105.068924_1.pdf [file plntphys_pp.105.068924_1.pdf]

# Characterization of Terfestatin A, a New Specific Inhibitor for Auxin Signaling.

Atsushi Yamazoe, Ken-ichiro Hayashi, Stefan Kepinski, Ottoline Leyser, and Hiroshi Nozaki\*

From the Department of Biochemistry, Okayama University of Science, 1-1 Ridai-cho, Okayama City 700-0005 Japan (A.Y., K-I.H., H.N.); and Department of Biology, University of York, Box 373, York YO10 5YW, United Kingdom (S.K., O.L.)

Running title: A new specific inhibitor of auxin action

‡ To whom correspondence should be addressed: Department of Biochemistry, Okayama University of Science, 1-1 Ridai-cho, Okayama City 700-0005 Japan. Tel.: +81-86-256-9661; Fax: +81-86-256-9559; E-mail: hayashi@dbc.ous.ac.jp

## CONTENTS:

### 1. Supplemental Figures 1 – 6.

Figure 1. Terfestatin A (TrfA) had no effects on the induction of auxin-responsive gene expression and the GUS enzymatic activity.

Figure 2. TrfA counteracted NAA on auxin-induced lateral root formation and *DR5::GUS* expression.

Figure 3. TrfA counteracted 2,4-D on auxin-induced lateral root formation and *DR5::GUS* expression.

Figure 4. TrfA restored NAA-induced primary root inhibition.

Figure 5. TrfA restored 2,4-D induced primary root inhibition.

Figure 6. TrfA counteracted IAA on auxin-induced hypocotyl inhibition.

1. Supplemental Figures 1 - 6.

Supplemental Figure 1.

Terfestatin A (TrfA) had no effects on the induction of auxin-responsive gene expression and the GUS enzymatic activity.

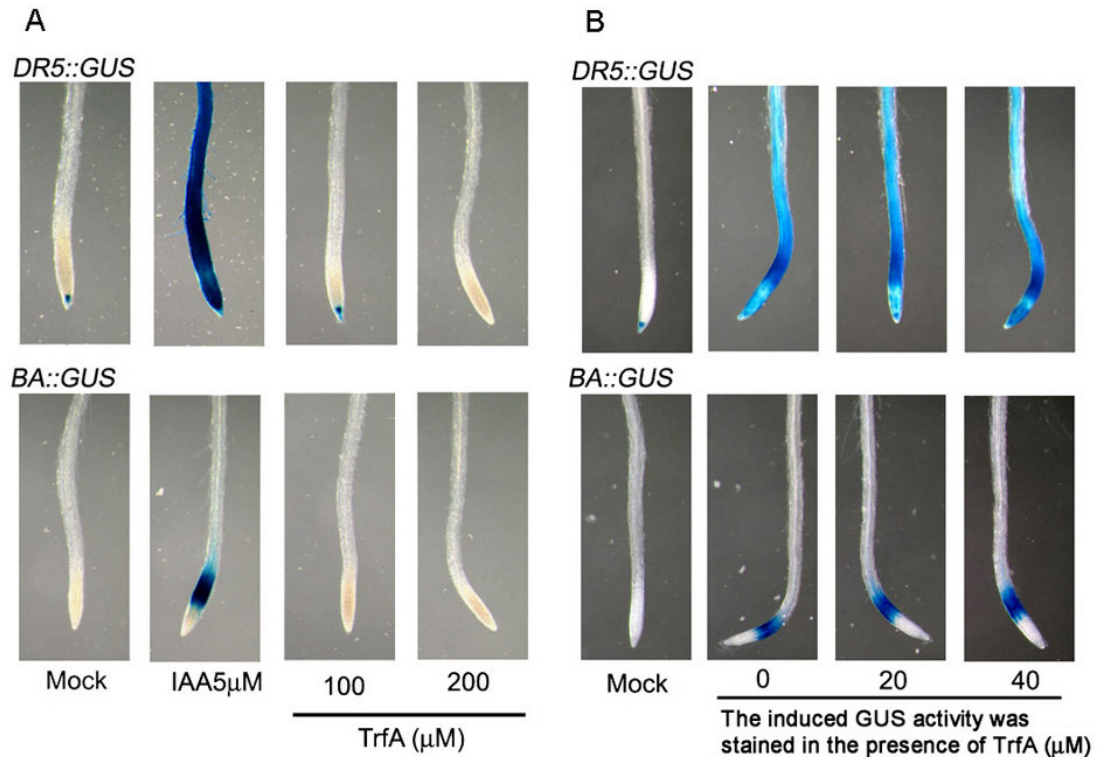

*A*, Five-day-old *BA::GUS* or *DR5::GUS* seedlings were treated with 5 $\mu$ M IAA or with TrfA for 12 h. After the induction, the seedlings were washed with a GUS-staining buffer and transferred to the GUS-staining buffer containing 1 mM X-Gluc, the substrate for histochemical staining and incubated at 37 °C until sufficient staining developed.

*B*, The IAA-induced GUS enzymatic activity was measured in the presence of TrfA to examine the effect of TrfA on GUS enzyme activity. 5-day-old *BA::GUS* or *DR5::GUS* seedlings were treated with 5 $\mu$ M IAA for 7 h. After the induction, the induced GUS activity was stained by the GUS-staining buffer containing 1 mM X-Gluc and 20 or 40  $\mu$ M TrfA.

Supplemental Figure 2.

TrfA counteracted NAA on auxin-induced lateral root formation and *DR5::GUS* expression.

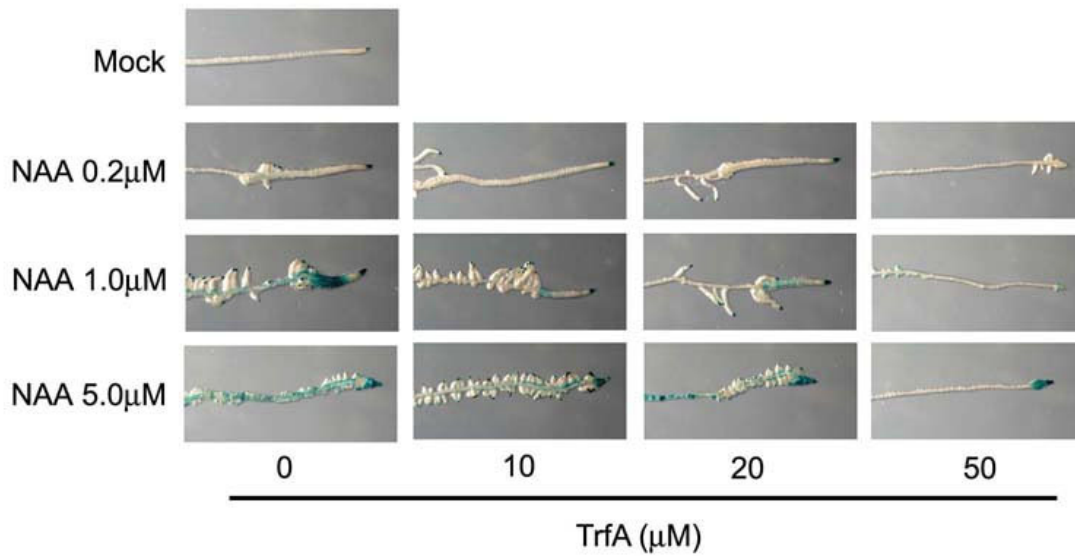

Four-day-old *DR5::GUS* seedlings were transferred to liquid GM media containing various concentrations of NAA and/or TrfA and incubated for additional 3 days. After cultivation, GUS expression was visualized by X-Gluc.

Supplemental Figure 3.

TrfA counteracted 2,4-D on auxin-induced lateral root formation and *DR5::GUS* expression.

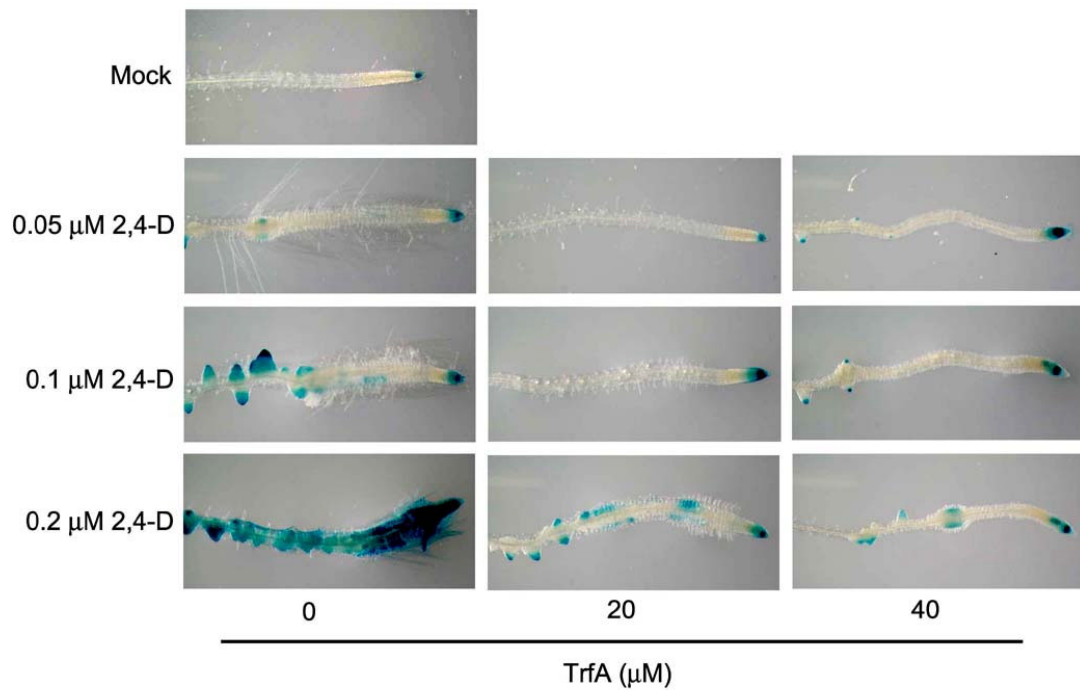

Four-day-old *DR5::GUS* seedlings were transferred to liquid GM media containing various concentrations of 2,4-D and/or TrfA and incubated for additional 3 days. After cultivation, GUS expression was visualized by X-Gluc.

Supplemental Figure 4.  
TrfA restored NAA-induced primary root inhibition.

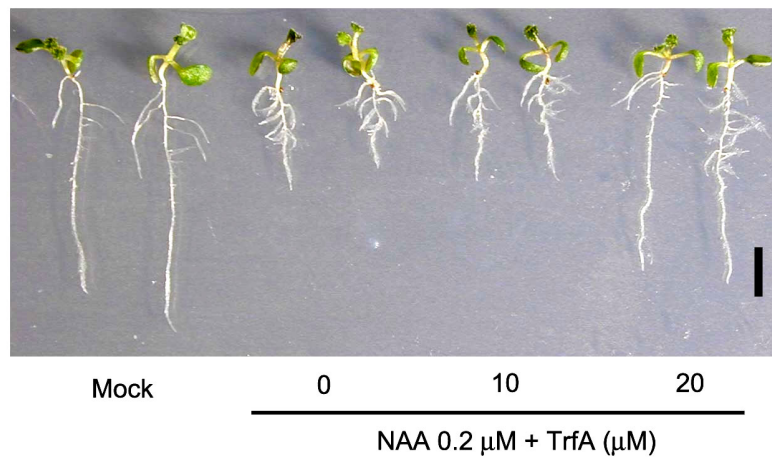

Three-day-old seedlings were transferred to liquid GM media containing various concentrations of TrfA in the presence of 0.2 μM NAA and incubated for additional 4 days. Bar represents 5 mm.

Supplemental Figure 5.  
TrfA restored 2,4-D induced primary root inhibition.

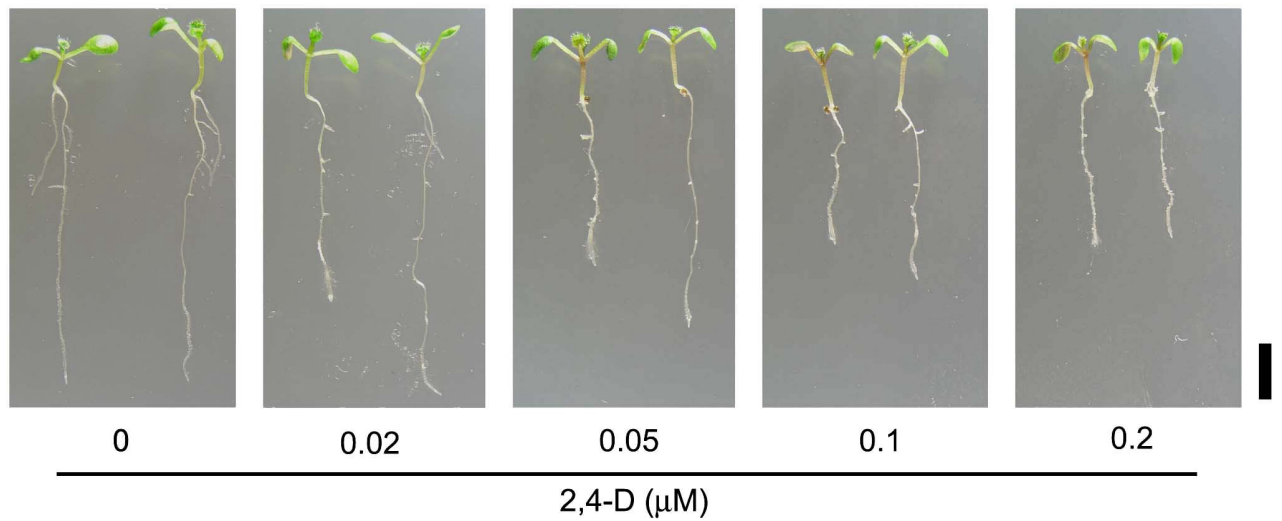

Four-day-old seedlings were transferred to liquid GM media containing various concentrations of 2,4-D in the absence (left seedling) or presence (right seedling) of 20  $\mu\text{M}$  TrfA and incubated for additional 3 days under continuous light. Bar represents 5 mm.

Supplemental Figure 6.  
TrfA counteracted IAA on auxin-induced hypocotyl inhibition.

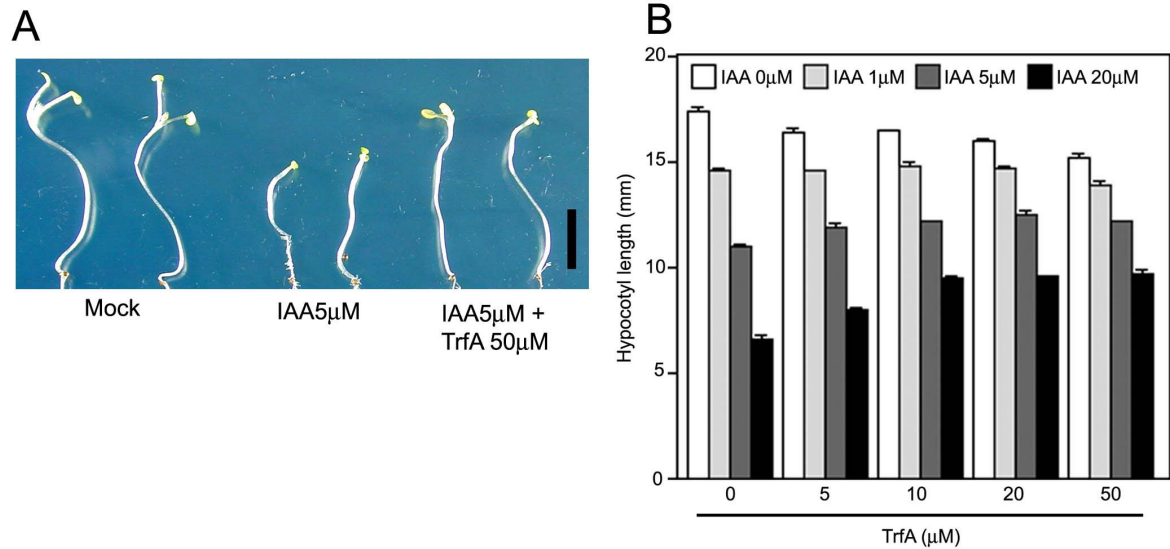

*A.* Three-day-old etiolated seedlings were transferred into liquid GM medium containing 50  $\mu$ M TrfA in the presence of 5  $\mu$ M IAA and then incubated for another 4 days in dark. Bar represents 5 mm.

*B.* Three-day-old seedlings were transferred into liquid GM medium containing the indicated concentration of TrfA with or without various concentrations of IAA. The hypocotyl length was measured after another 4 days culture in dark. Error bars, S.E.
